# Supplementary material for: Expanding the environmental virome: Infection profile in a native rainforest tree species
Source: PubMed Central journal article supplement (PMC9387356; doi:10.3389/fmicb.2022.874319), 2022-08-04
Supplement: Data_Sheet_2.pdf [file Data_Sheet_2.pdf]

# Supplementary Material

## **Expanding the environmental virome: Infection profile in a native rainforest tree species.**

Anderson Carvalho Vieira<sup>1,#</sup>, Ícaro Santos Lopes<sup>2,#</sup>, Paula Luize Camargos Fonseca<sup>3</sup>, Roenick Proveti Olmo<sup>4</sup>, Letícia Maróstica de Vasconcelos<sup>1</sup>, Carlos Priminho Pirovani<sup>3</sup>, Fernanda Amato Gaiotto<sup>1,\*</sup>, Eric Roberto Guimarães Rocha Aguiar<sup>1,\*</sup>

<sup>1</sup>Department of Biological Science (DCB), Center of Biotechnology and Genetics (CBG), Universidade Estadual de Santa Cruz (UESC), Ilhéus, Bahia, CEP 45662-900, Brazil

<sup>2</sup>Department of Biochemistry and Immunology, Instituto de Ciências Biológicas, Universidade Federal de Minas Gerais, Belo Horizonte, Minas Gerais, CEP 30270-901, Brazil;

<sup>3</sup>Department of Genetics, Instituto de Ciências Biológicas, Universidade Federal de Minas Gerais, Belo Horizonte, Minas Gerais, CEP 30270-901, Brazil

<sup>4</sup>Université de Strasbourg, CNRS UPR9022, Inserm, Strasbourg, France

<sup>#</sup>These authors contributed equally to his work.

<sup>\*</sup>Both corresponding authors contributed equally to this work.

**Figure S1. Metagenomics analysis based on assembled transcripts.** Analysis was performed using Kaiju webserver with NCBI NR database.

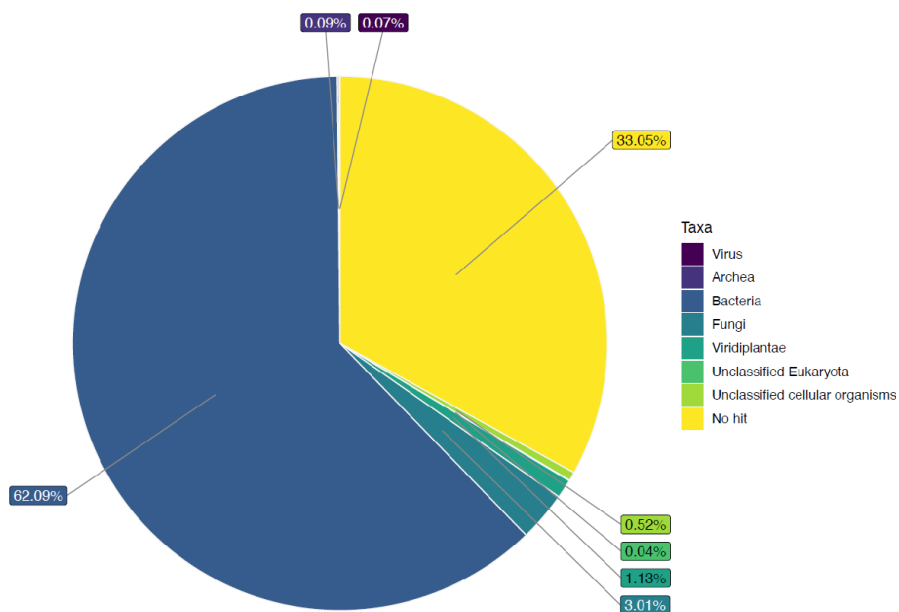

**Figure S2. Structural and domain annotation of *Skokie picorna-like virus*.**

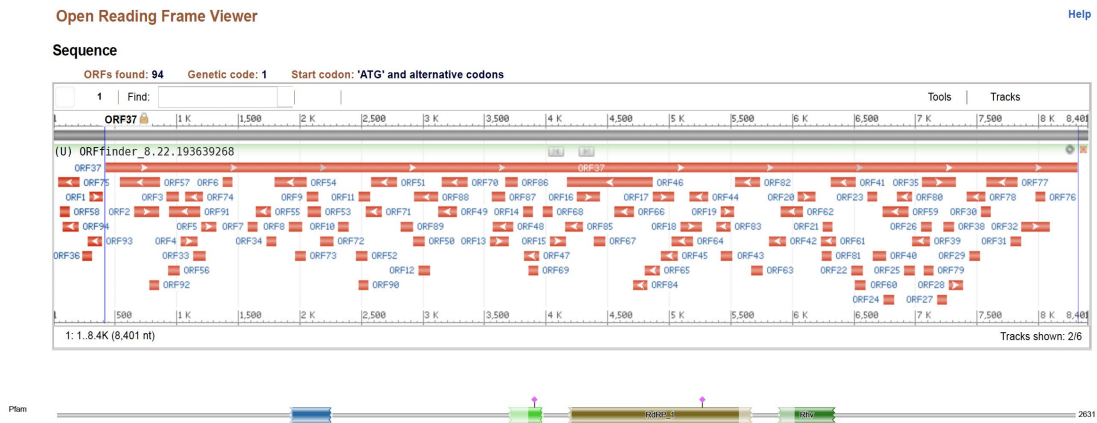

**Figure S3. Structural and domain annotation of closest sequences from *Bromoviridae* family.**

*Lilac ring mottle virus* – Movement protein

Open Reading Frame Viewer

Help

Sequence

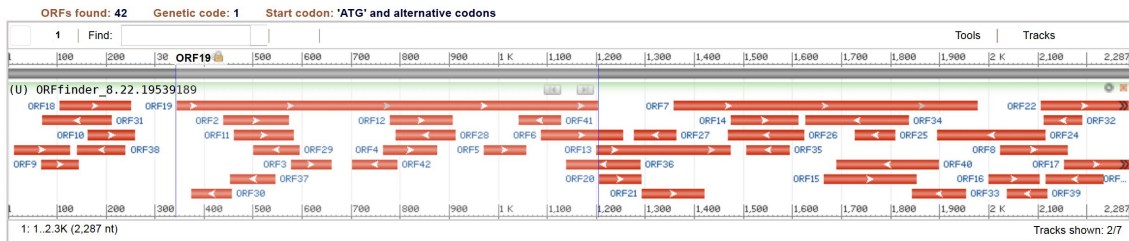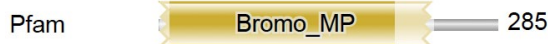

*Citrus leaf rugose virus*- RdRP

Open Reading Frame Viewer

Help

Sequence

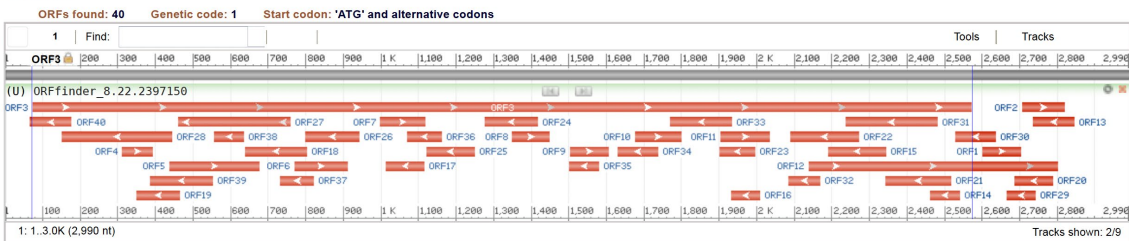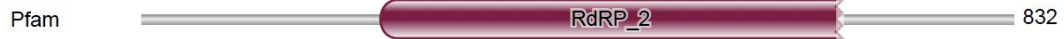

*Tomato necrotic streak virus* - Replicase

Open Reading Frame Viewer

Help

Sequence

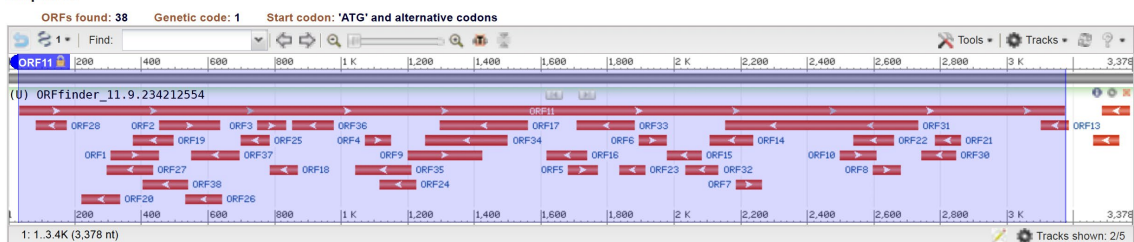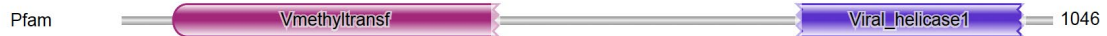

**Figure S4. Structural and domain annotation of *Chicken genomovirus mg4\_1247*.**

Open Reading Frame Viewer

Help

Sequence

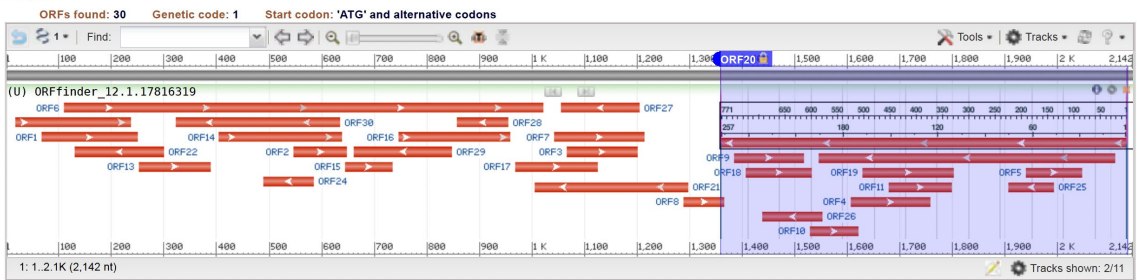

Pfam

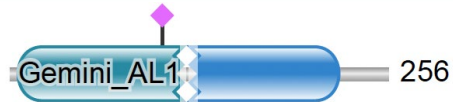

**Table S1. Field collection and overview of samples and RNA deep sequencing of *Carpotroche brasiliensis* organs**

| Sample                 | Ecosystems   | WGS 84<br>(World Geodetic System) | ID                 | Organ      | Sex | Reads after sequencing  | Reads after trimmomatic           |
|------------------------|--------------|-----------------------------------|--------------------|------------|-----|-------------------------|-----------------------------------|
| 1                      | Agroforestry | 14°05'15"S,<br>39°14'11"W         | CVB 07             | flower bud | ♀   | 1.843.178               | 1.093.210<br>(70.02%)             |
| 2                      | Agroforestry | 14°05'17"S,<br>39°14'19"W         | CVB 14             | flower bud | ♂   | 1.092.821               | 772.653<br>(70.70%)               |
| 5                      | Agroforestry | 14°05'09"S,<br>39°14'19"W         | CVB 12             | flower bud | ♂   | 1.726.172               | 1.231.572<br>(71.35%)             |
| 25                     | Agroforestry | 14°05'15"S,<br>39°14'11"W         | CVB 07             | flower bud | ♀   | 1.736.441               | 1.247.547<br>(71.85%)             |
| 26                     | Agroforestry | 14°05'15"S,<br>39°14'11"W         | CVB 08             | flower bud | ♀   | 1.685.607               | 1.135.844<br>(67.38%)             |
| 29                     | Agroforestry | 14°05'17"S,<br>39°14'19"W         | CVB 14             | flower     | ♂   | 1.870.044               | 1.061.472<br>(71.34%)             |
| 30                     | Agroforestry | 14°05'12"S,<br>39°14'09"W         | CVB 04             | fruit      |     | 1.487.803               | 1.076.762<br>(69.45%)             |
| 50                     | Agroforestry | 14°05'15"S,<br>39°14'11"W         | CVB 08             | seed       | ♀   | 1.913.780               | 1.689.561<br>(67.88%)             |
| 65                     | Agroforestry | 14°05'12"S,<br>39°14'09"W         | CVB 10             | leaf       | ♀   | 2.488.977               | 1.333.571<br>(70.60%)             |
| 74                     | Agroforestry | 14°05'15"S,<br>39°14'09"W         | CVB 11             | root       | --- | 1.923.348               | 1.225.955<br>(65.64%)             |
| 81                     | Agroforestry | 14°05'15"S,<br>39°14'11"W         | CVB 09             | seed       | ♀   | 1.464.053               | 1.288.500<br>(69.91%)             |
| 6                      | Forest       | 14°06'51"S,<br>39°16'15"W         | A 03               | flower bud | ♀   | 1.710.431               | 1.200.003<br>(70.16%)             |
| 10                     | Forest       | 14°06'54"S,<br>39°16'19"W         | A 04               | flower bud | ♀   | 1.667.608               | 1.159.280<br>(69.52%)             |
| 67                     | Forest       | 14°06'61"S,<br>39°16'25"W         | A 10               | flower bud | ♀   | 1.664.347               | 1.217.672<br>(73.16%)             |
| 17                     | Forest       | 14°06'51"S,<br>39°16'15"W         | A 06               | flower bud | ♂   | 1.965.345               | 1.376.394<br>(70.03%)             |
| 7                      | Forest       | 14°06'54"S,<br>39°16'19"W         | A 07               | flower     | ♀   | 2.315.336               | 1.631.935<br>(70.48%)             |
| 46                     | Forest       | 14°06'56"S,<br>39°16'18"W         | A 15               | seed       | ♀   | 1.538.784               | 1.369.276<br>(71.55%)             |
| 72                     | Forest       | 14°06'56"S,<br>39°16'18"W         | A 16               | leaf       | ♂   | 1.888.874               | 1.311.732<br>(68.20%)             |
| 21                     | Forest       | 14°06'56"S,<br>39°16'18"W         | A 17               | root       | --- | 1.870.044               | 1.335.482<br>(71.41%)             |
| 78                     | Forest       | 14°06'56"S,<br>39°16'18"W         | A 15               | seed       | ♀   | 1.867.660               | 930.949<br>(63.59%)               |
| <b>Proteomics data</b> |              |                                   |                    |            |     |                         |                                   |
|                        | Ecosystems   | WGS 84<br>(World Geodetic System) | Number of samples  | Organ      | Sex | Total peptides produced | Peptides matching viral sequences |
|                        | Agroforestry | 14°05'09.6"S<br>39°14'09.6"W      | 2 X (3 replicates) | seed       | ♀   | 26977                   | 201                               |

**Table S2. Overview of the transcriptome assembly.**

| <b>Metric</b>                       | <b>Amount</b> |
|-------------------------------------|---------------|
| Number of contigs                   | 281,643       |
| Number of bases in all contigs (bp) | 160,909,318   |
| N50                                 | 481           |
| Longest Contig (bp)                 | 56,208        |
| Median contig size (bp)             | 423           |

**Table S4. Overview of sequences showing similarity to viral species.**

| Contigs                             | Length | Organism hit                                               | Protein hit                    | Alignment method | e-value | Coverage |
|-------------------------------------|--------|------------------------------------------------------------|--------------------------------|------------------|---------|----------|
| Carpotroche-associated picornavirus | 8636   | Skokie picorna-like virus                                  | polyprotein                    | BlastN           | 0.0     | 96%      |
| Carpotroche-associated ilarvirus    | 2442   | Lilac ring mottle virus                                    | movement protein               | BlastN           | 0.0     | 89%      |
| Carpotroche-associated ilarvirus    | 2954   | Citrus leaf rugose virus                                   | replicase protein 2a           | BlastN           | 0.0     | 65%      |
| Carpotroche-associated ilarvirus    | 3467   | Spinach latent virus                                       | replicase                      | BlastN           | 1E-127  | 62%      |
| Carpotroche-associated genomovirus  | 943    | Chicken genomovirus mg4_1247                               | replication-associated protein | BlastX           | 2E-050  | 62%      |
| NODE_9936                           | 1673   | Biomphalaria virus 2                                       | polyprotein                    | BlastN           | 3E-056  | 35%      |
| NODE_15442                          | 1321   | Maize fine streak nucleorhabdovirus                        | N                              | BlastX           | 7E-102  | 88%      |
| NODE_18845                          | 1156   | Maize fine streak nucleorhabdovirus                        | G                              | BlastX           | 9E-037  | 66%      |
| NODE_23163                          | 1005   | Beta vulgaris mitovirus 1                                  | RNA-dependent RNA polymerase   | BlastX           | 4E-021  | 26%      |
| NODE_23836                          | 983    | Maize fine streak nucleorhabdovirus                        | L                              | BlastX           | 3E-076  | 72%      |
| NODE_33142                          | 769    | Erysiphe necator associated ourmia-like virus 41           | RNA-dependent RNA polymerase   | BlastN           | 1E-171  | 70%      |
| NODE_39152                          | 686    | Maize fine streak nucleorhabdovirus                        | N                              | BlastX           | 6E-026  | 89%      |
| NODE_39399                          | 683    | Botrytis cinerea mitovirus 8                               | RNA-dependent RNA polymerase   | BlastN           | 2E-021  | 17%      |
| NODE_41237                          | 664    | Maize fine streak nucleorhabdovirus                        | L                              | BlastX           | 4E-091  | 86%      |
| NODE_41497                          | 662    | Plasmopara viticola lesion associated ourmia-like virus 87 | RNA-dependent RNA polymerase   | BlastN           | 0.0     | 87%      |
| NODE_45025                          | 632    | Hubei narna-like virus 2                                   | RNA-dependent RNA polymerase   | BlastX           | 4E-030  | 70%      |
| NODE_47371                          | 615    | Macrophomina phaseolina mitovirus 3                        | putative replicase             | BlastN           | 8E-033  | 50%      |
| NODE_48513                          | 607    | Maize fine streak nucleorhabdovirus                        | N                              | BlastX           | 4E-018  | 41%      |
| NODE_48606                          | 607    | Plasmopara viticola lesion associated ourmia-like virus 41 | RNA-dependent RNA polymerase   | BlastN           | 9E-178  | 70%      |
| NODE_50646                          | 594    | Maize fine streak nucleorhabdovirus                        | L                              | BlastX           | 6E-051  | 74%      |
| NODE_51288                          | 591    | Erysiphales ourmia-like virus 2                            | RNA-dependent RNA polymerase   | BlastN           | 0.0     | 75%      |
| NODE_53114                          | 582    | Erysiphales ourmia-like virus 2                            | RNA-dependent RNA polymerase   | BlastN           | 0.0     | 70%      |
| NODE_54016                          | 577    | Fusarium andiyazi mitovirus 1                              | RdRP                           | BlastN           | 0.0     | 100%     |
| NODE_57998                          | 559    | Plasmopara viticola lesion associated mononegaambi virus 2 | putative nucleocapsid          | BlastX           | 8E-09   | 58%      |
| NODE_58741                          | 556    | Fusarium circinatum mitovirus 2-1                          | RNA-dependent RNA polymerase   | BlastN           | 5E-180  | 74%      |
| NODE_59063                          | 555    | Plasmopara viticola lesion associated ourmia-like virus 59 | RNA-dependent RNA polymerase   | BlastN           | 2E-127  | 93%      |
| NODE_60104                          | 550    | Maize fine streak nucleorhabdovirus                        | L                              | BlastX           | 6E-024  | 66%      |
| NODE_60865                          | 547    | Carnation etched ring virus                                | Enzymatic polyprotein          | BlastX           | 4E-053  | 99%      |



|            |     |                                                               |                                 |        |        |     |
|------------|-----|---------------------------------------------------------------|---------------------------------|--------|--------|-----|
| NODE_68365 | 521 | Plasmopara viticola lesion associated<br>ourmia-like virus 90 | RNA-dependent<br>RNA polymerase | BlastN | 5E-142 | 68% |
| NODE_74445 | 503 | Tobacco vein clearing virus                                   | putative coat protein           | BlastX | 2E-015 | 80% |

---
